# Supplementary material for: Staphylococcal Superantigen-Like Protein 1 and 5 (SSL1 & SSL5) Limit Neutrophil Chemotaxis and Migration through MMP-Inhibition
Source: Int J Mol Sci. 2016 Jul 5;17(7):1072. doi: 10.3390/ijms17071072 (PMC4964448; doi:10.3390/ijms17071072)
Supplement: Supplementary file 1 [file ijms-17-01072-s001.pdf]

# Supplementary Materials: Staphylococcal Superantigen-Like Protein 1 and 5 (SSL1 & SSL5) Limit Neutrophil Chemotaxis and Migration through MMP-Inhibition

Kirsten J. Koymans, Adinda Bisschop, Mignon M. Vughs, Kok P. M. van Kessel, Carla J. C. de Haas and Jos A. G. van Strijp

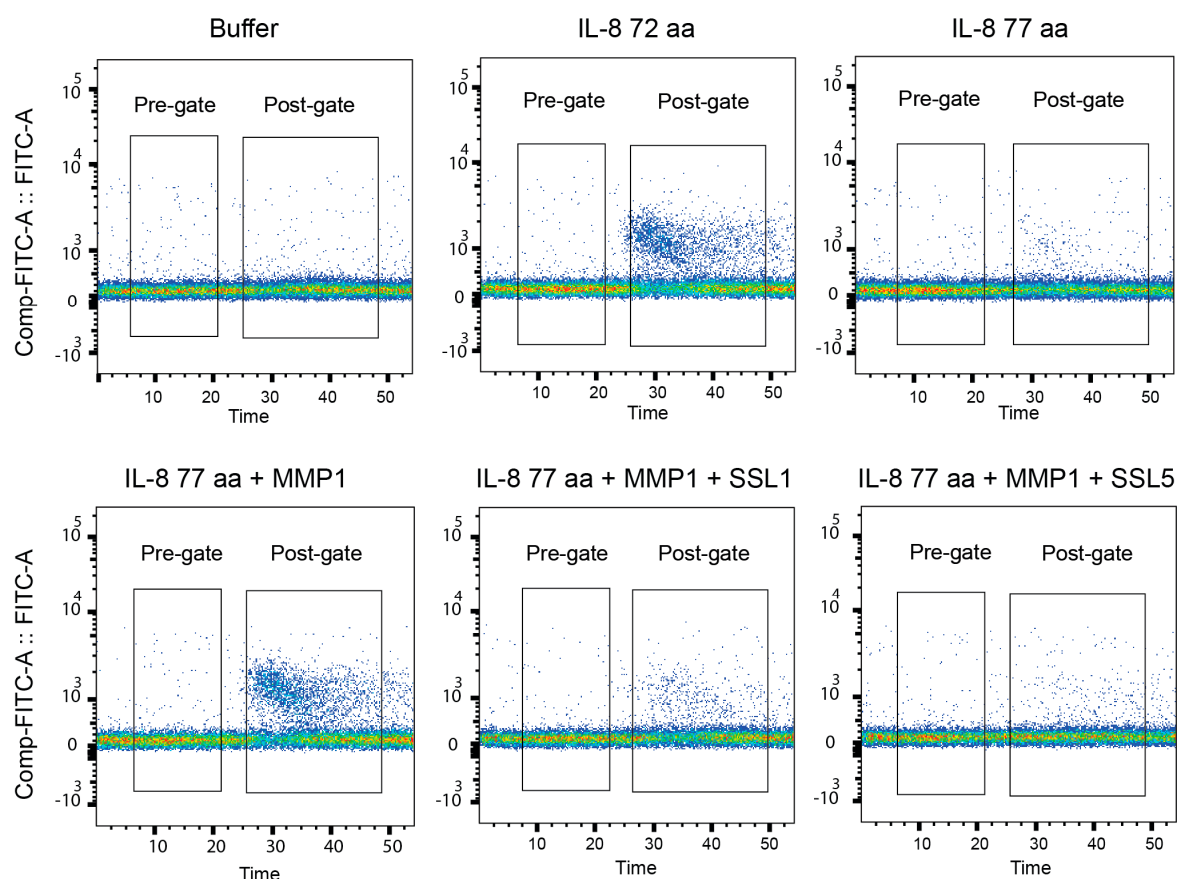

**Figure S1.** Calcium flux image of a representative experiment with MMP1.

U937 cells stably expressing CXCR1 were stimulated with different variants of IL-8 (all final concentration of  $1 \times 10^{-7}$  M): IL-8 72 aa, IL-8 77 aa, IL-8 77 aa treated with MMP (10  $\mu\text{g/mL}$ ), and IL-8 77 aa treated with a combination of MMP and SSL (10  $\mu\text{g/mL}$ ). The mixes were allowed to incubate overnight before calcium flux was determined. Samples were measured for 50 s (stimulus was added after 10 s) and mean FITC-A fluorescence was determined pre-stimulus (Pre-gate) and post-stimulus (Post-gate). To define the final calcium flux for each sample the mean fluorescence from the Pre-gate was subtracted from the mean fluorescence from the Post-gate.

**Table S1.** Characteristics and activation of the MMPs and ADAMs.

| <b>MMP</b>                      | <b>Activation</b> | <b>Trypsin<br/>Concentration</b> | <b>Concentration in<br/>Activity Assay</b> |
|---------------------------------|-------------------|----------------------------------|--------------------------------------------|
| MMP1 (Interstitial collagenase) | 20 min at RT      | 10 µg/mL                         | 2 µg/mL                                    |
| MMP2 (Gelatinase A)             | 2 h at 37 °C      | –                                | 4 µg/mL                                    |
| MMP7 (Matrilysin)               | 2 h at 37 °C      | 10 µg/mL                         | 1 µg/mL                                    |
| MMP8 (Neutrophil collagenase)   | 3 h at 37 °C      | 10 µg/mL                         | 2 µg/mL                                    |
| MMP9 (Gelatinase B)             | 2 h at 37 °C      | 10 µg/mL                         | 0.8 µg/mL                                  |
| MMP12 (Macrophage elastase)     | 20 min at RT      | 10 µg/mL                         | 1 µg/mL                                    |
| MMP13 (Collagenase-3)           | 30 min at 37 °C   | 10 µg/mL                         | 0.4 µg/mL                                  |
| MMP14 (MT1-MMP)                 | 60 min at RT      | 5 µg/mL                          | 2 µg/mL                                    |
| ADAM10                          | –                 | –                                | 2 µg/mL                                    |
| ADAM17                          | –                 | –                                | 0.8–2 µg/mL                                |
